# Supplementary material for: Palladium Schiff base complex-modified Cu(BDC-NH2) metal–organic frameworks for C–N coupling
Source: Royal Society of Chemistry journal article supplement (doi:10.1039/d3ra01020a), 2023-01-01
Supplement: d3ra01020a1.pdf [file d3ra01020a1.pdf]

## Support Information

### Palladium Schiff-Base Complex Modified Cu(BDC-NH<sub>2</sub>) Metal Organic Framework Catalysts for used application in C-N Coupling reaction

Khadijeh Rabiei<sup>a\*</sup>, Zahra Mohammadkhani<sup>a</sup>, Hassan Keypour<sup>b</sup>, Jamal Kouhdareh<sup>b</sup>

<sup>a</sup>Department of Chemistry, Faculty of Science, Qom University of Technology, Qom, Iran

<sup>b</sup>Department of Inorganic Chemistry, Faculty of Chemistry, Bu-Ali Sina University Hamedan,  
6517838683, Iran

**<sup>1</sup>H NMR Spectrum 3-(furan-2-yl)-1-(p-tolyl)pyrrolo[1,2-a]pyrazine(3a)**

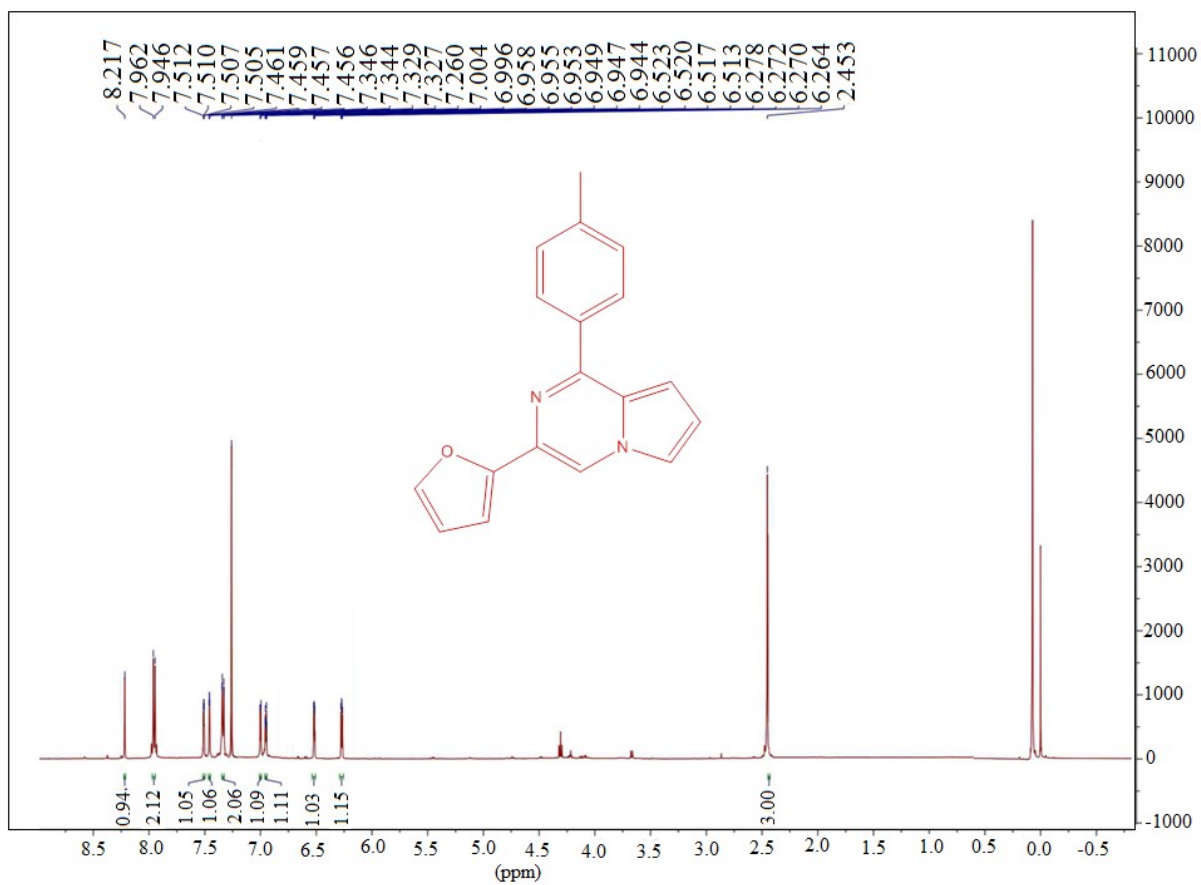

**$^{13}\text{C}\{^1\text{H}\}$  NMR Spectrum 3-(furan-2-yl)-1-(*p*-tolyl)pyrrolo[1,2-*a*]pyrazine(3a)**

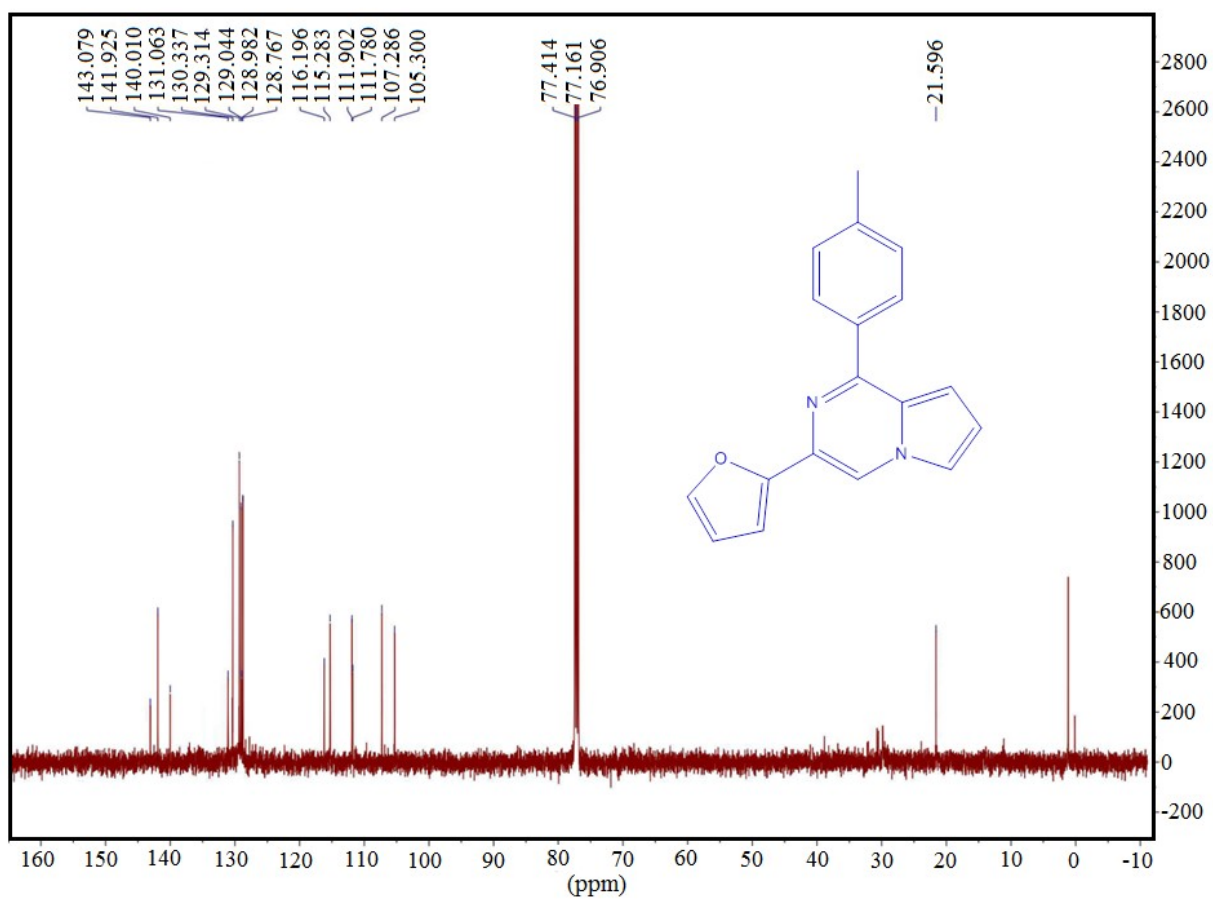

**$^1\text{H}$  NMR Spectrum 3-(naphthalen-2-yl)-1-(*p*-tolyl)pyrrolo[1,2-*a*]pyrazine(3b)**

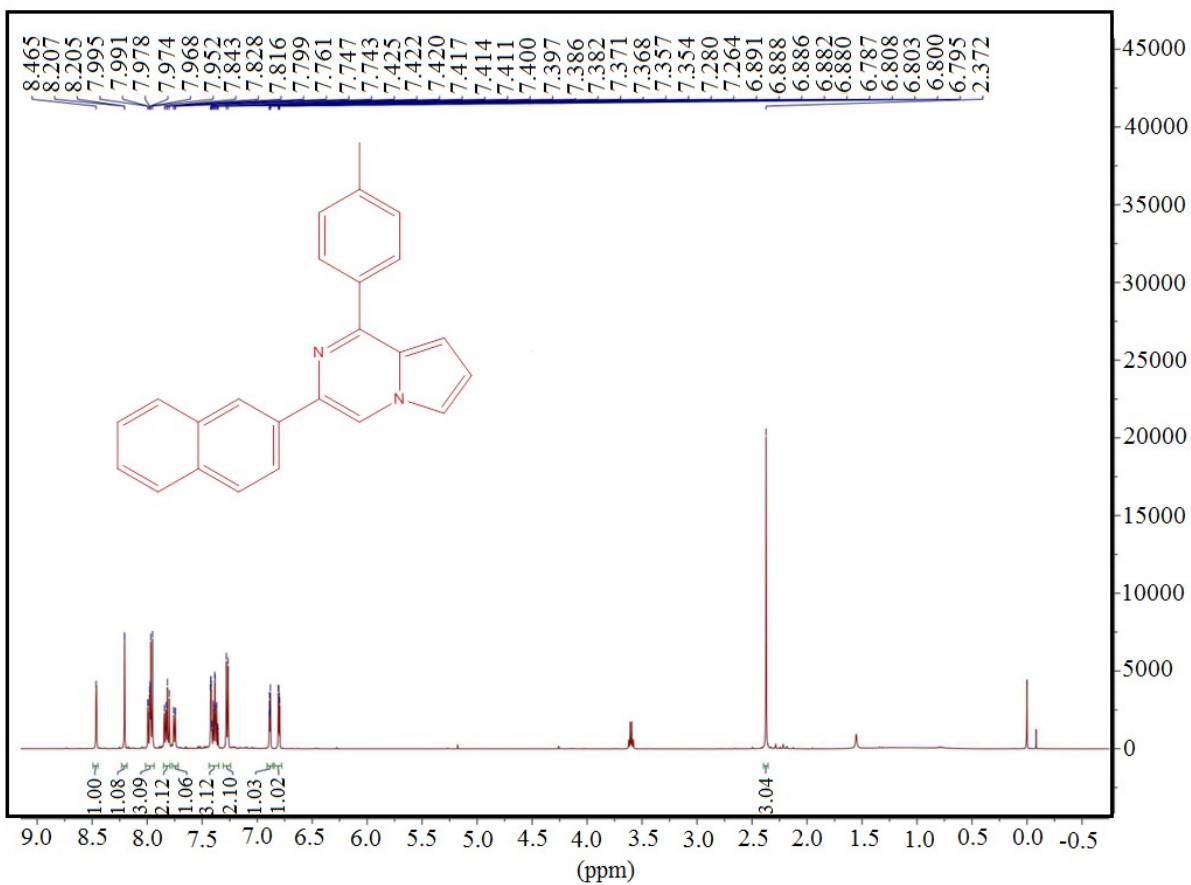

$^{13}\text{C}\{^1\text{H}\}$  NMR Spectrum 3-(naphthalen-2-yl)-1-(*p*-tolyl)pyrrolo[1,2-*a*]pyrazine(3b)

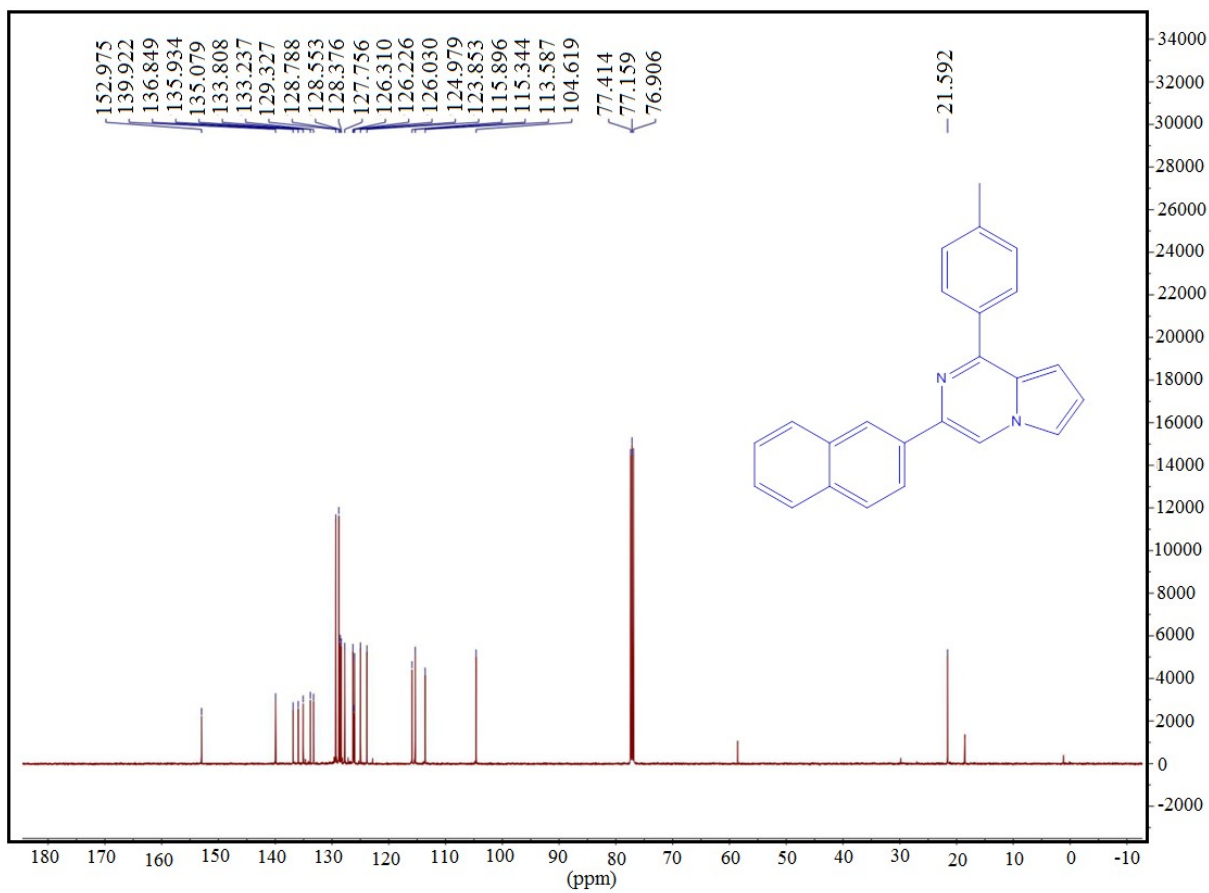

**<sup>1</sup>H NMR Spectrum 3-phenethyl-1-(p-tolyl)pyrrolo[1,2-a]pyrazine(3c)**

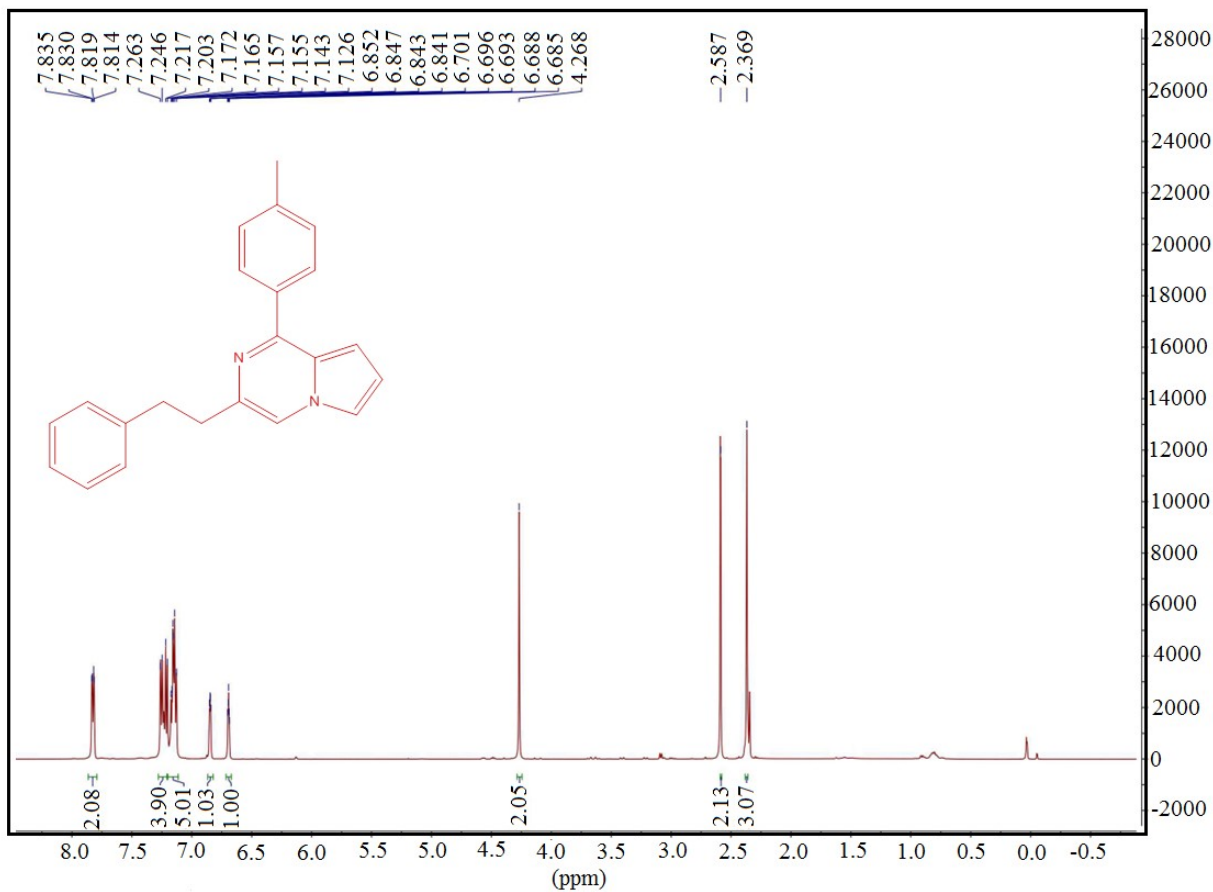

<sup>13</sup>C{<sup>1</sup>H} NMR Spectrum 3-phenethyl-1-(p-tolyl)pyrrolo[1,2-a]pyrazine(3c)

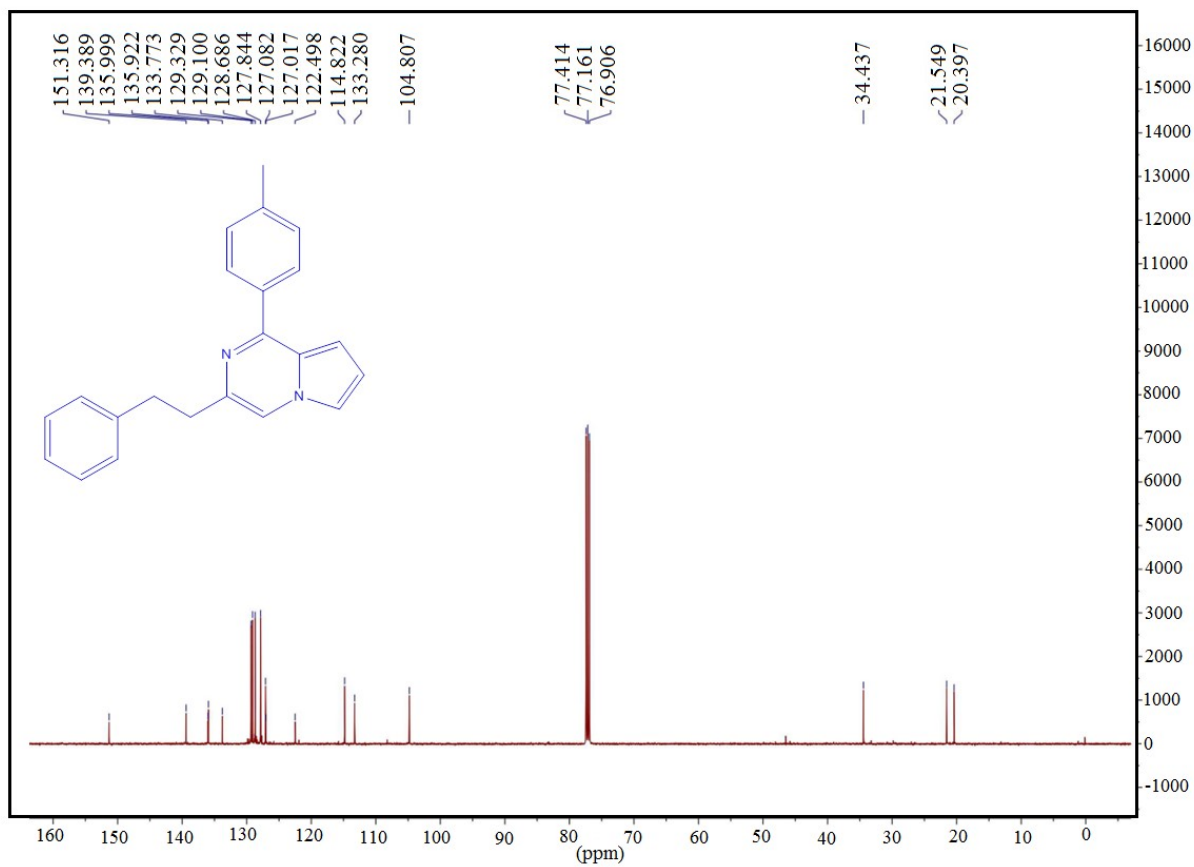

**<sup>1</sup>H NMR Spectrum 1-(4-methoxyphenyl)-3-phenylpyrrolo[1,2-a]pyrazine(3d)**

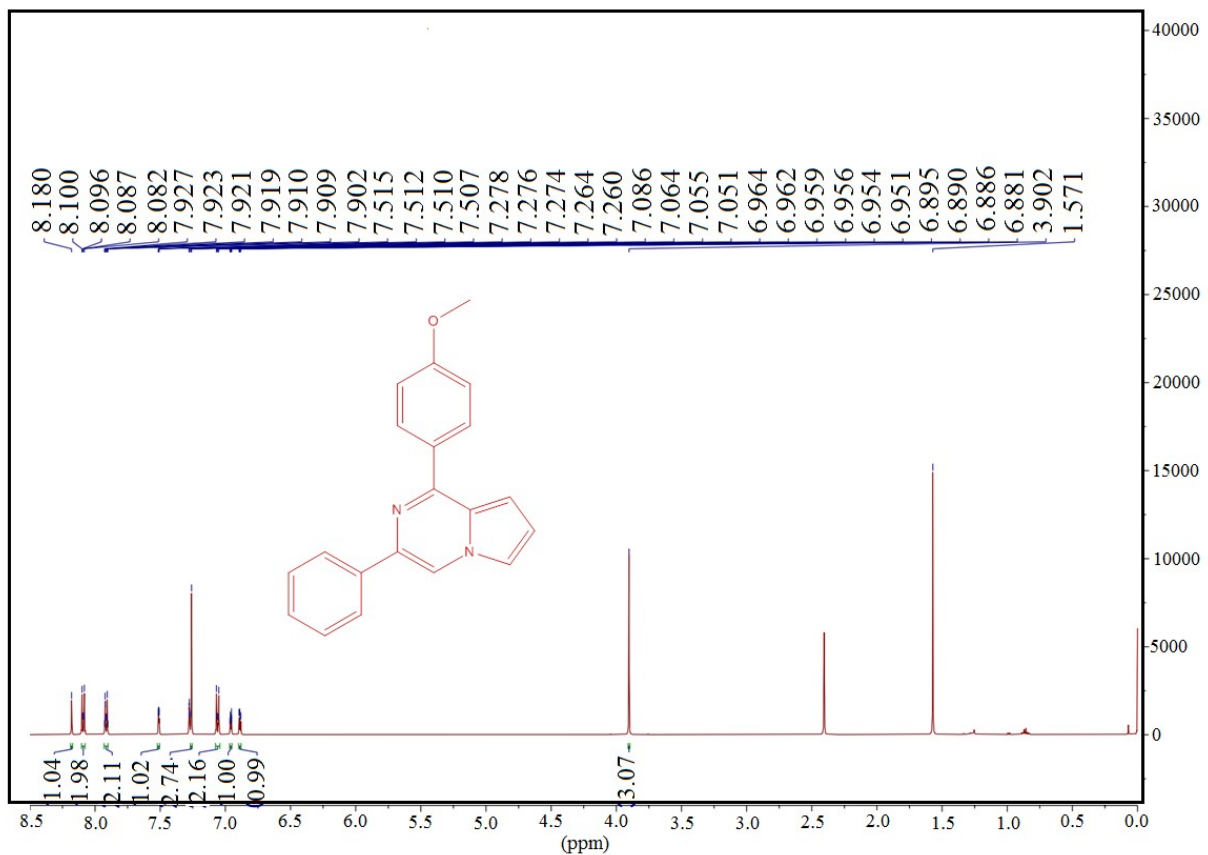

$^{13}\text{C}\{^1\text{H}\}$  NMR Spectrum 1-(4-methoxyphenyl)-3-phenylpyrrolo[1,2-a]pyrazine(3d)



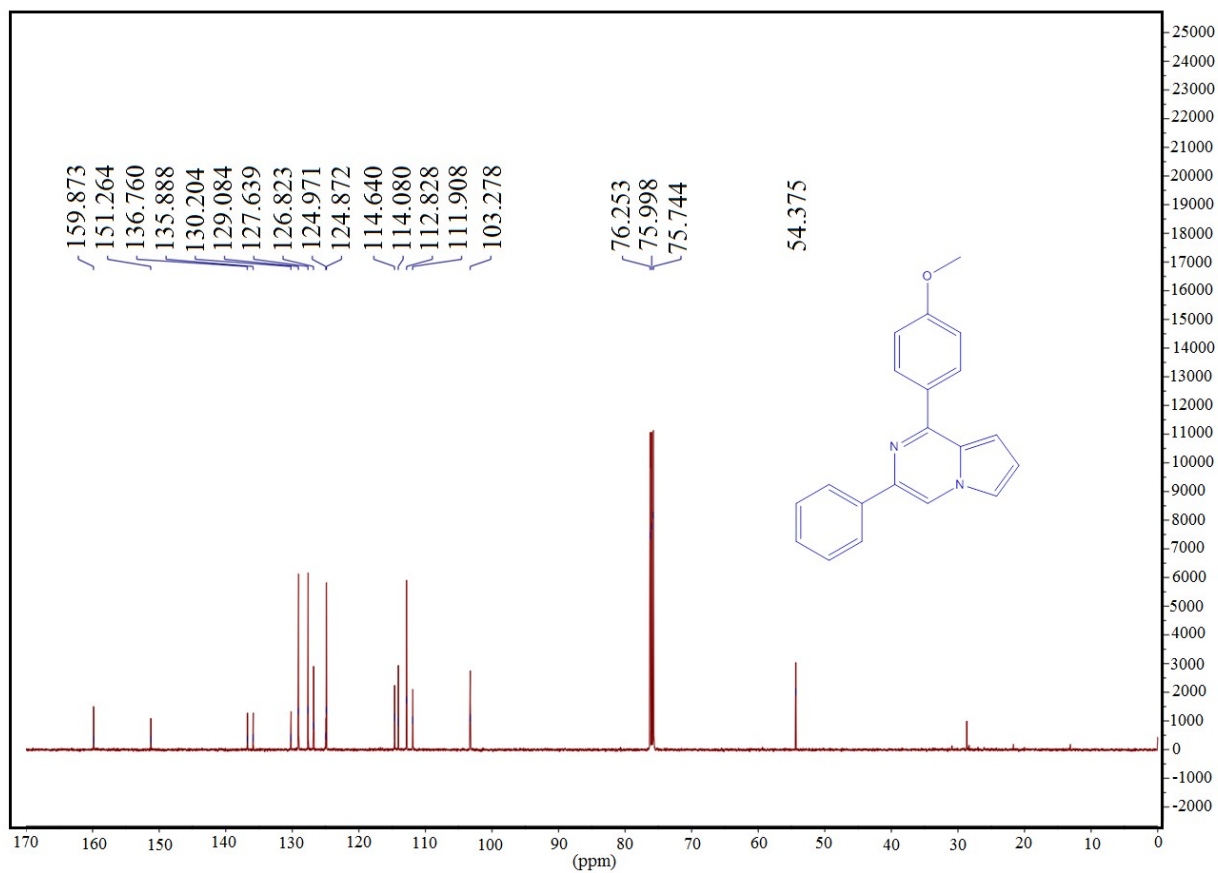

**<sup>1</sup>H NMR Spectrum 3-(2-bromophenyl)-1-(*p*-tolyl)pyrrolo[1,2-*a*]pyrazine(3e)**

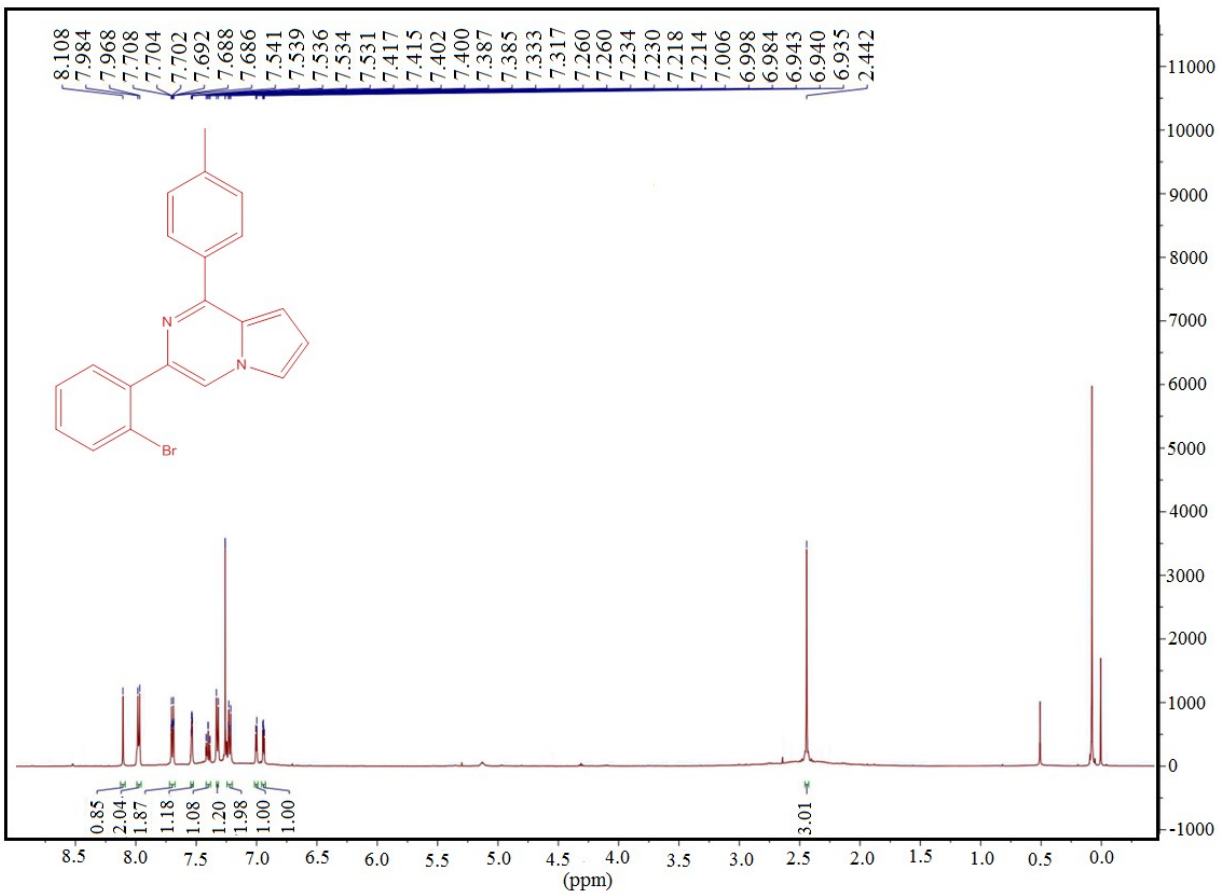

$^{13}\text{C}\{^1\text{H}\}$  NMR Spectrum 3-(2-bromophenyl)-1-(*p*-tolyl)pyrrolo[1,2-*a*]pyrazine(3e)

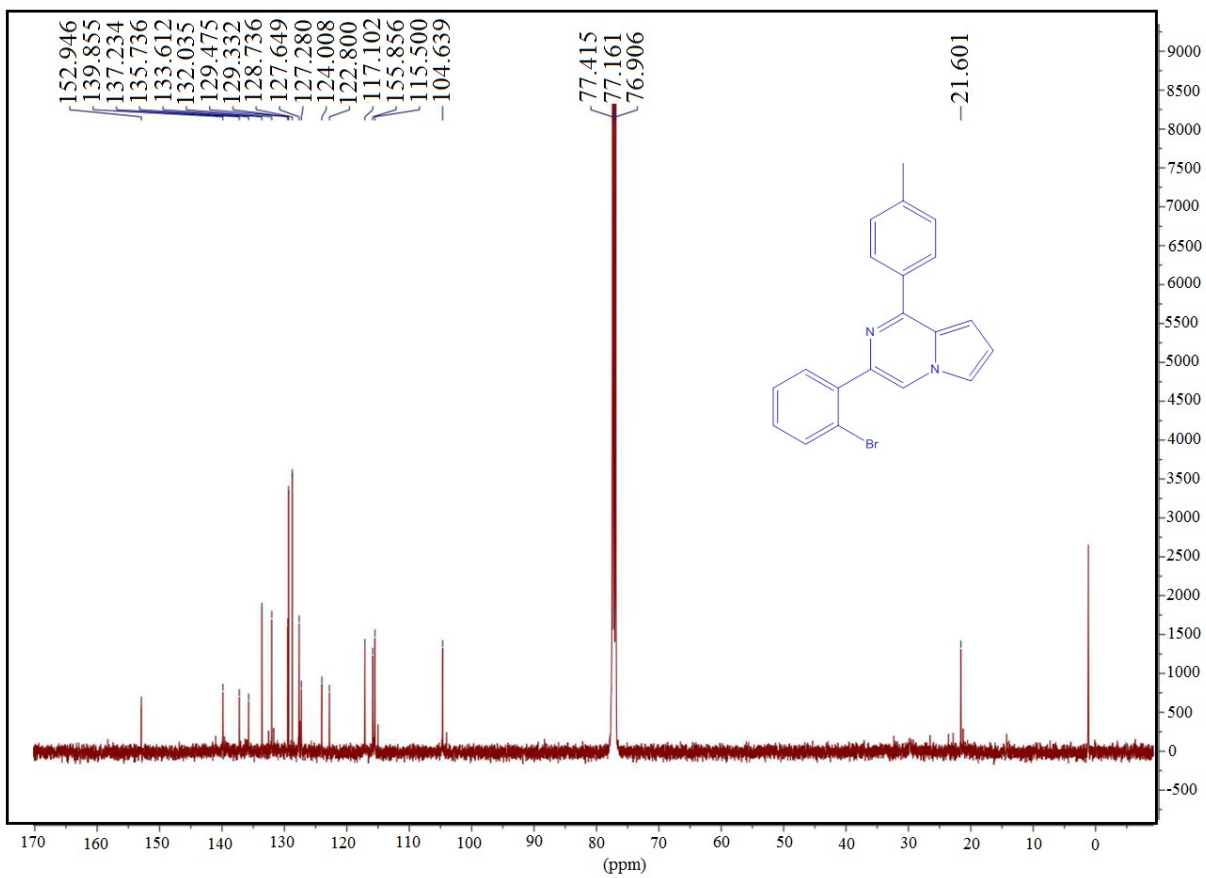

**<sup>13</sup>C NMR Spectrum 3-phenyl-1-(p-tolyl)pyrrolo[1,2-a]pyrazine(3f)**

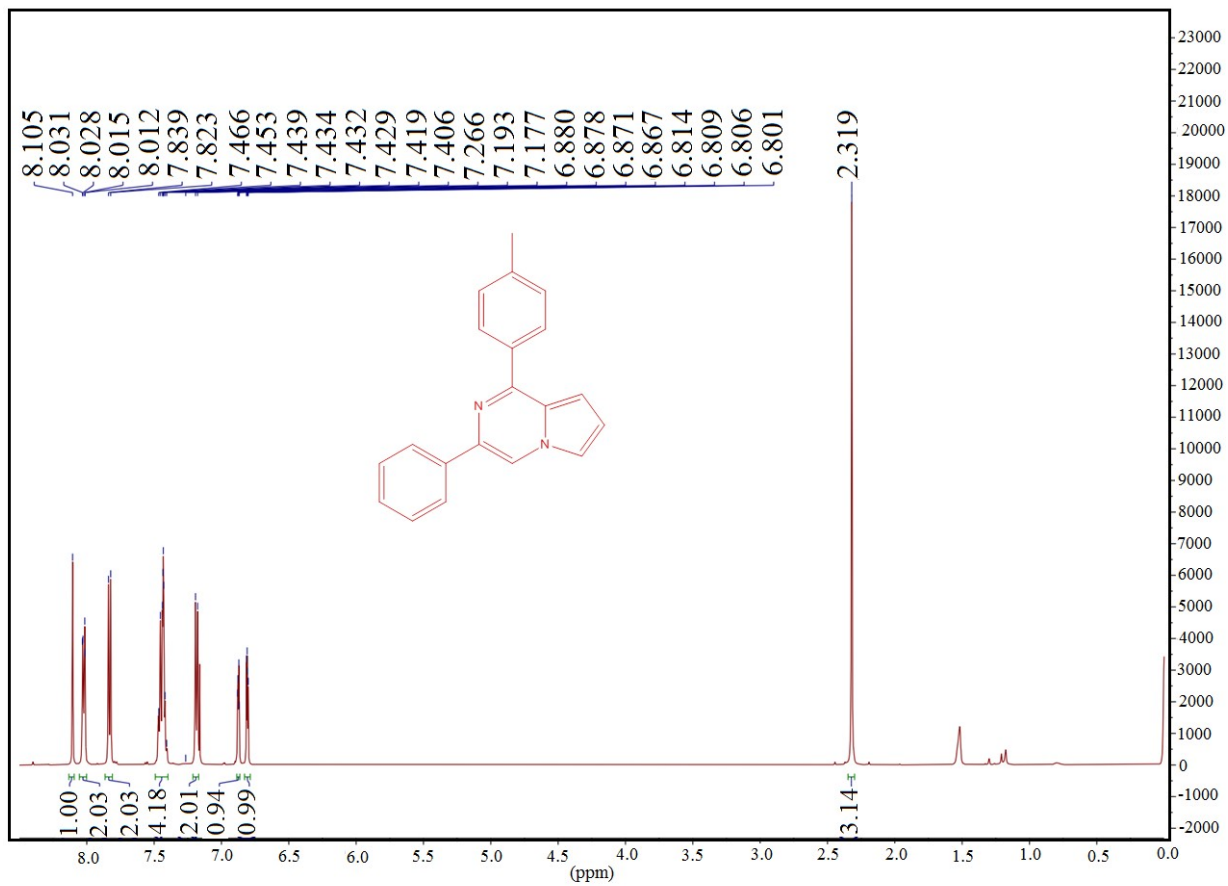

$^{13}\text{C}\{^1\text{H}\}$  NMR Spectrum 3-phenyl-1-(p-tolyl)pyrrolo[1,2-a]pyrazine(3f)

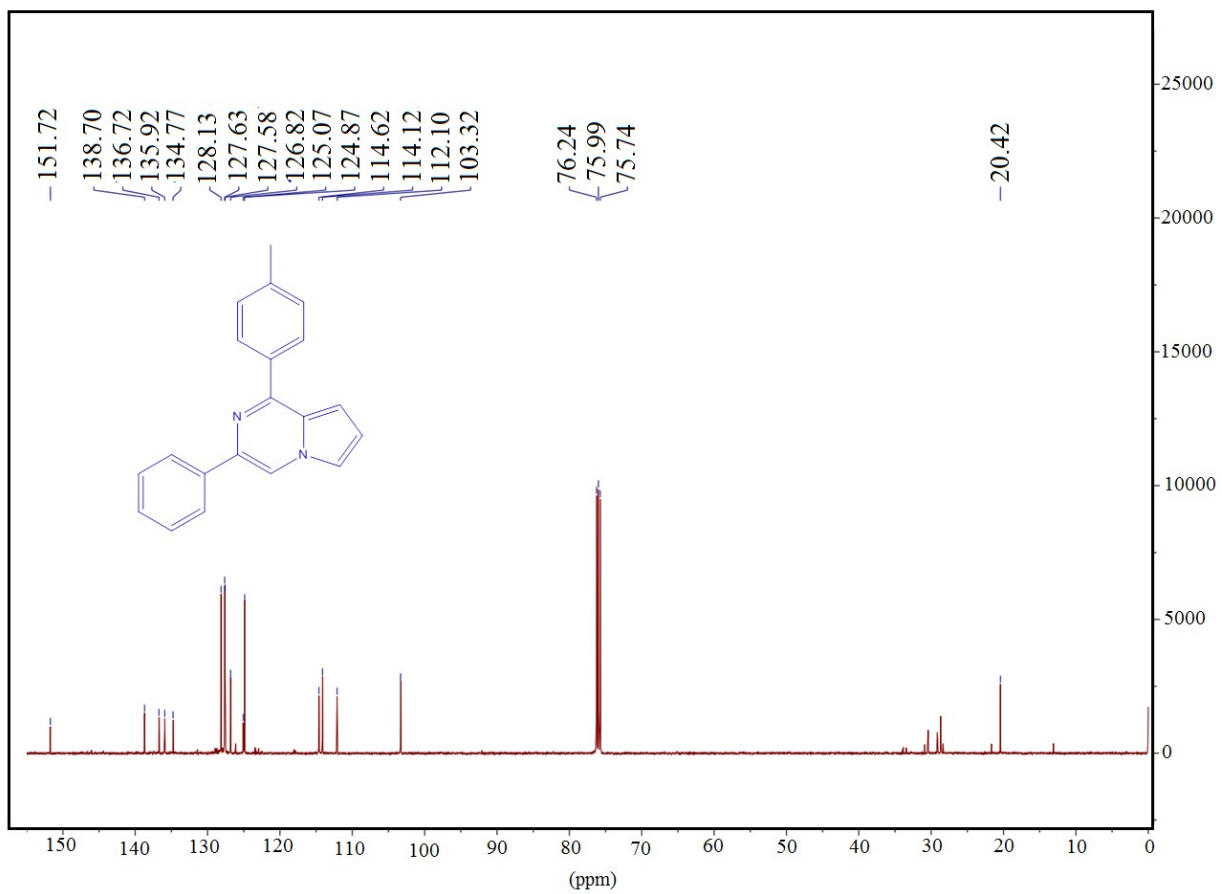

**$^{13}\text{C}$  NMR Spectrum 1-(4-chlorophenyl)-3-phenylpyrrolo[1,2-a]pyrazine(3g)**

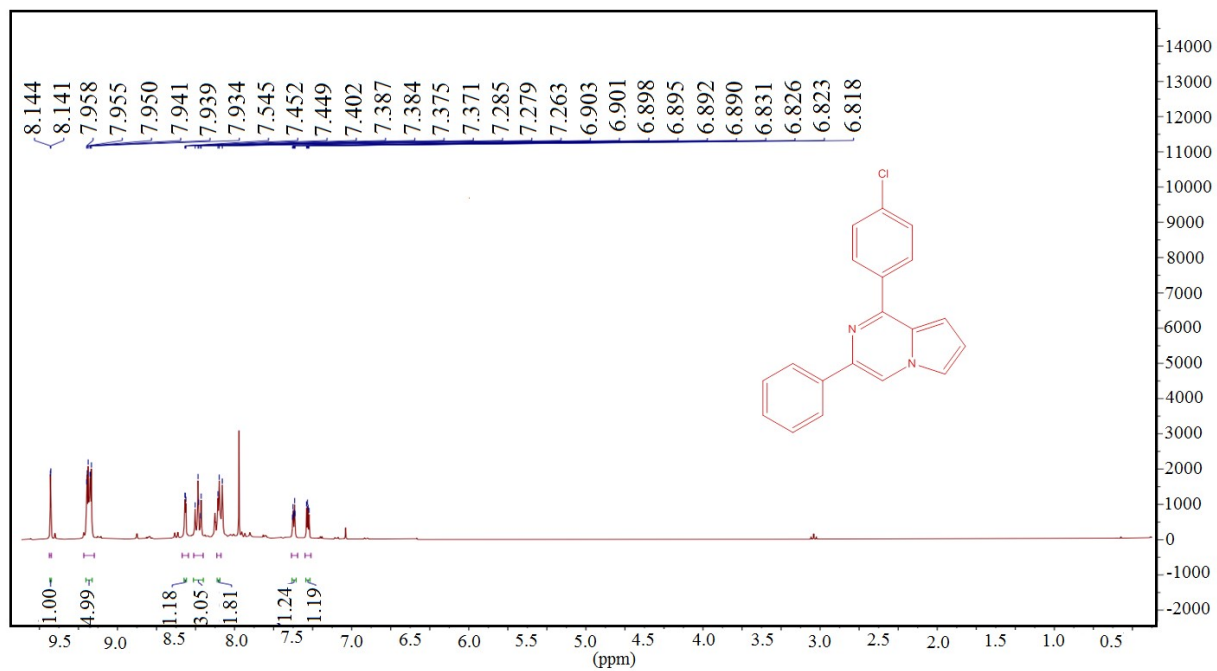

**<sup>13</sup>C{<sup>1</sup>H} NMR Spectrum 1-(4-chlorophenyl)-3-phenylpyrrolo[1,2-a]pyrazine(3g)**

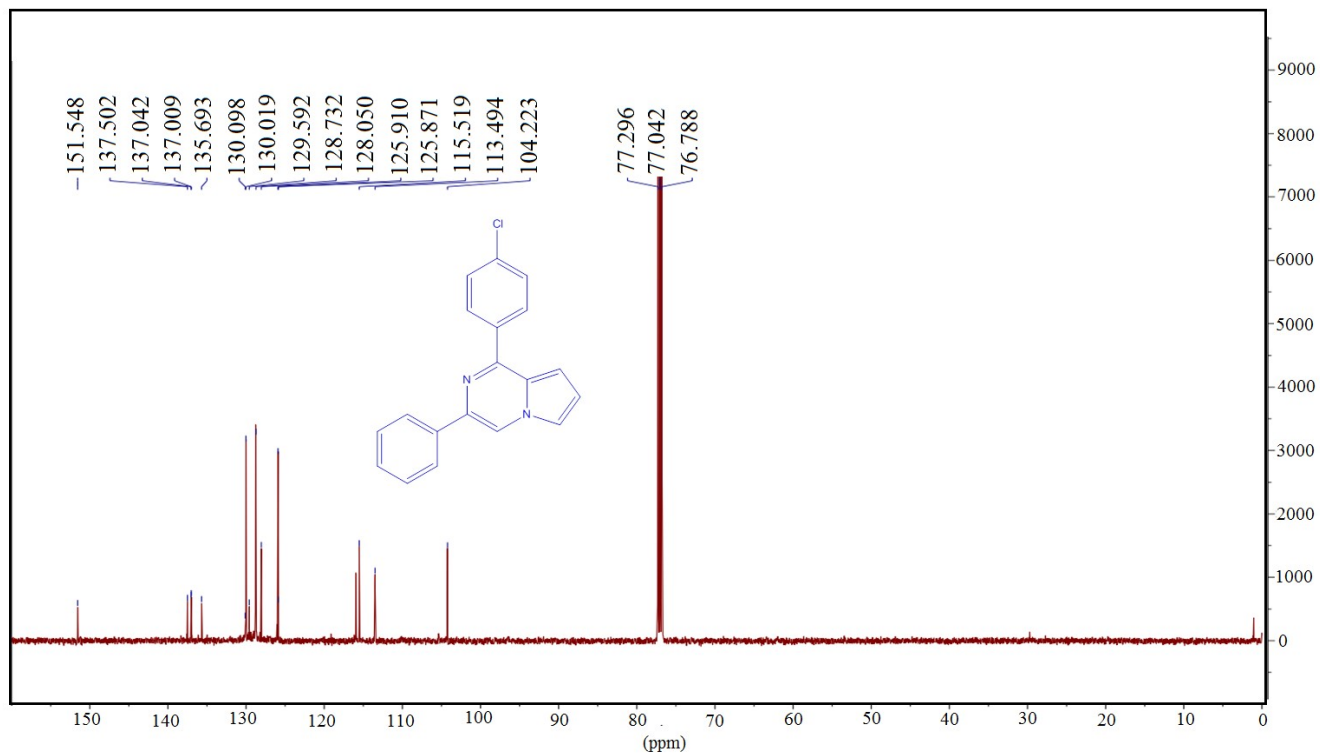

**<sup>1</sup>H NMR Spectrum 1-(3-chlorophenyl)-3-phenylpyrrolo[1,2-*a*]pyrazine(3h)**

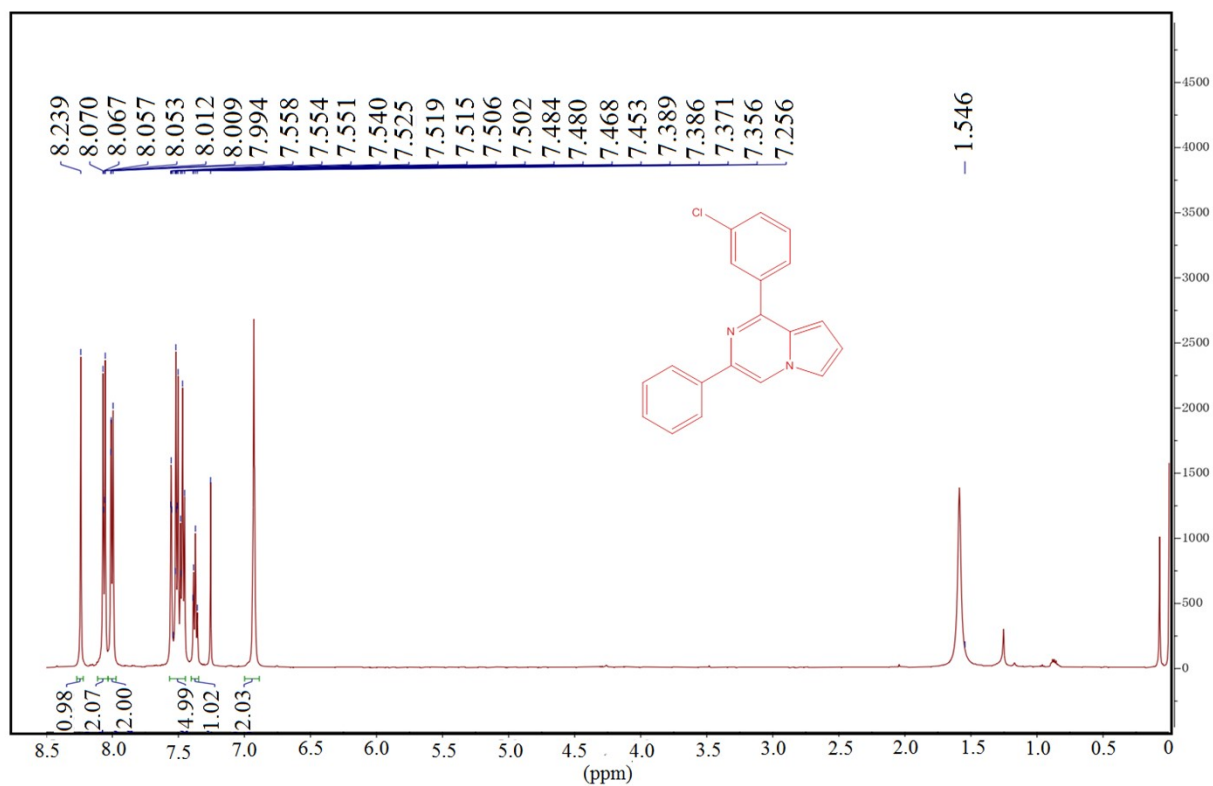

**<sup>13</sup>C{<sup>1</sup>H} NMR Spectrum 1-(3-chlorophenyl)-3-phenylpyrrolo[1,2-*a*]pyrazine(3h)**

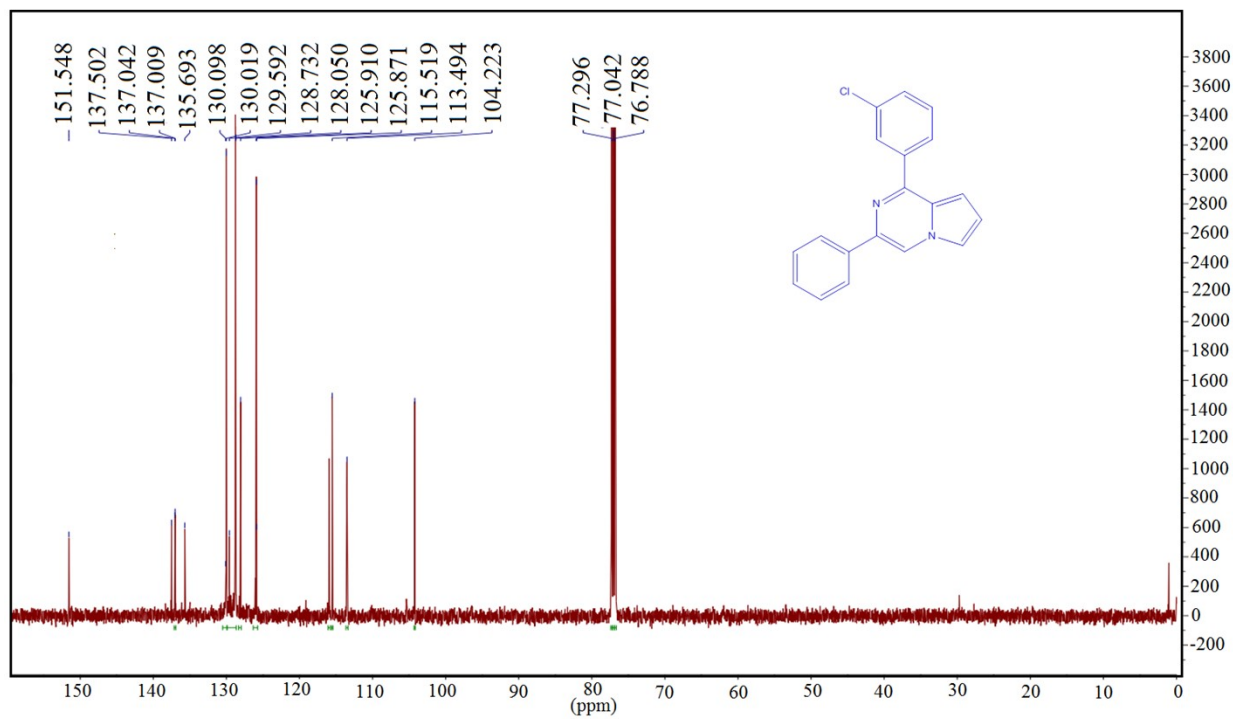



### **<sup>1</sup>H NMR Solid Spectrum for [Cu(BDC-NH<sub>2</sub>)@Schiff-Base-Pd(II)]**

The <sup>1</sup>H NMR results indicate two types of hydrogen bonded to the amine nitrogen in the structure of the metal-organic framework. This spectrum indicates that the surface amine nitrogens form imine with the ligand in question and are part of free internal amines.

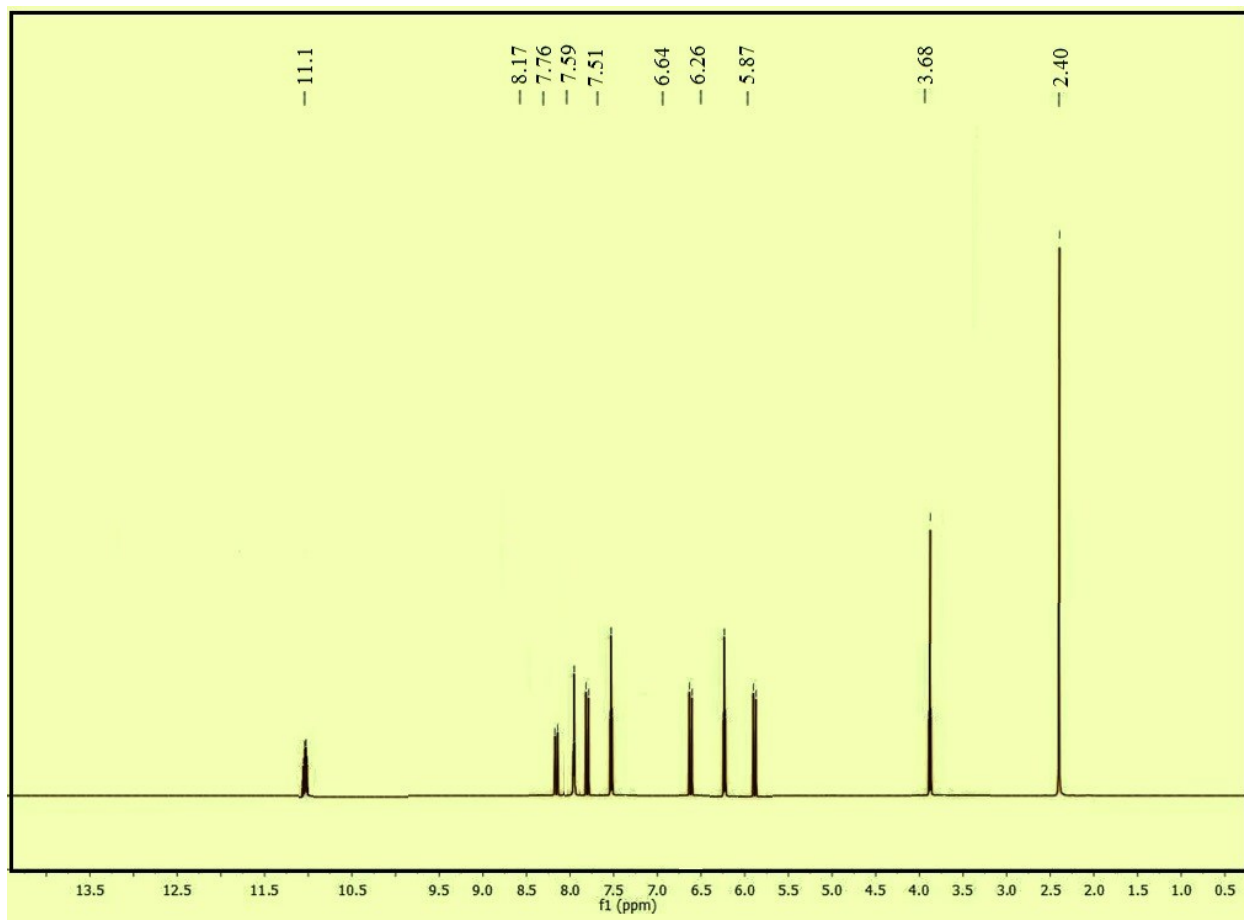

In order to investigate the positive effect of the synthesis and application of this metal organic framework with copper-based catalytic carriers, we synthesized some of them according to the instructions and used them in the synthesis of product number 3a in comparison with the mentioned catalyst. Inputs 1 to 4 can be seen due to the penetration of palladium inside the sites, the available surface of the catalyst is less, as a result, the product efficiency is lower.

**Table 1.** Comparison of the effect of different catalyst carriers containing Cu for use in the synthesis of products with C-N coupling<sup>a</sup>.

| Entry | Catalyst Carriers                                     | Yield (%) | Refs.     |
|-------|-------------------------------------------------------|-----------|-----------|
| 1     | Cu-MOF                                                | 62        | [1]       |
| 2     | Mn/Cu metal-organic frameworks                        | 51        | [2]       |
| 3     | MOF-891                                               | 57        | [3]       |
| 4     | Cu-MOF2                                               | 48        | [4]       |
| 5     | [Cu(BDC-NH <sub>2</sub> )@Schiff base Pd(II)]catalyst | 66        | This work |

<sup>a</sup>Product sample (3a)

## Reference

1. Mollabagher, H., et al., *Cu-metal organic frameworks (Cu-MOF) as an environment-friendly and economical catalyst for one pot synthesis of tacrine derivatives*. RSC advances, 2020. **10**(4): p. 1995-2003.
2. Le, Q.B., et al., *Electrochemical performance of composite electrodes based on rGO, Mn/Cu metal-organic frameworks, and PANI*. Scientific Reports, 2022. **12**(1): p. 664.
3. Nguyen, H.T., et al., *A highly active copper-based metal-organic framework catalyst for a friedel-crafts alkylation in the synthesis of bis (indolyl) methanes under ultrasound irradiation*. Arabian Journal of Chemistry, 2020. **13**(1): p. 1377-1385.
4. Omkaramurthy, B., G. Krishnamurthy, and S. Foro, *Synthesis and characterization of mesoporous crystalline copper metal-organic frameworks for electrochemical energy storage application*. SN Applied Sciences, 2020. **2**: p. 1-14.
